# Supplementary material for: Protein-Protein Interaction Analysis Highlights Additional Loci of Interest for Multiple Sclerosis
Source: PLoS One. 2012 Oct 18;7(10):e46730. doi: 10.1371/journal.pone.0046730 (PMC3475710; doi:10.1371/journal.pone.0046730)
Supplement: Table S3 — Results of DAVID gene ontology. (XLSX) [file pone.0046730.s003.xlsx]

## Sheet: DAVID results
Category	Term	Count	%	PValue	Genes	List Total	Pop Hits	Pop Total	Fold Enrichment	Bonferroni	Benjamini	FDR
GOTERM_BP_FAT	GO:0050863~regulation of T cell activation	10	27.027	1.71681e-12	802109, 825577, 786246, 792681, 818161, 819682, 813080, 790423, 819946, 811614	30	117	13528	38.5413	1.29107e-09	1.29107e-09	2.61394e-09
GOTERM_BP_FAT	GO:0051249~regulation of lymphocyte activation	10	27.027	1.46087e-11	802109, 825577, 786246, 792681, 818161, 819682, 813080, 790423, 819946, 811614	30	148	13528	30.4685	1.09857e-08	5.49285e-09	2.2242e-08
GOTERM_BP_FAT	GO:0002694~regulation of leukocyte activation	10	27.027	4.11734e-11	802109, 825577, 786246, 792681, 818161, 819682, 813080, 790423, 819946, 811614	30	166	13528	27.1647	3.09624e-08	1.03208e-08	6.26874e-08
GOTERM_BP_FAT	GO:0042129~regulation of T cell proliferation	8	21.6216	4.32041e-11	802109, 825577, 786246, 818161, 819682, 813080, 819946, 811614	30	62	13528	58.1849	3.24895e-08	8.12237e-09	6.57792e-08
GOTERM_BP_FAT	GO:0050865~regulation of cell activation	10	27.027	6.61827e-11	802109, 825577, 786246, 792681, 818161, 819682, 813080, 790423, 819946, 811614	30	175	13528	25.7676	4.97694e-08	9.95388e-09	1.00765e-07
GOTERM_BP_FAT	GO:0050870~positive regulation of T cell activation	8	21.6216	1.88253e-10	825577, 786246, 792681, 818161, 819682, 813080, 790423, 811614	30	76	13528	47.4667	1.41567e-07	2.35944e-08	2.8662e-07
GOTERM_BP_FAT	GO:0050670~regulation of lymphocyte proliferation	8	21.6216	3.53964e-10	802109, 825577, 786246, 818161, 819682, 813080, 819946, 811614	30	83	13528	43.4635	2.66181e-07	3.80259e-08	5.38918e-07
GOTERM_BP_FAT	GO:0032944~regulation of mononuclear cell proliferation	8	21.6216	3.85591e-10	802109, 825577, 786246, 818161, 819682, 813080, 819946, 811614	30	84	13528	42.946	2.89965e-07	3.62456e-08	5.87071e-07
GOTERM_BP_FAT	GO:0070663~regulation of leukocyte proliferation	8	21.6216	3.85591e-10	802109, 825577, 786246, 818161, 819682, 813080, 819946, 811614	30	84	13528	42.946	2.89965e-07	3.62456e-08	5.87071e-07
GOTERM_BP_FAT	GO:0002684~positive regulation of immune system process	10	27.027	1.0235e-09	818576, 825577, 786246, 792681, 818161, 819682, 813080, 790423, 819946, 811614	30	238	13528	18.9468	7.69673e-07	8.55193e-08	1.55831e-06
GOTERM_BP_FAT	GO:0051251~positive regulation of lymphocyte activation	8	21.6216	1.07348e-09	825577, 786246, 792681, 818161, 819682, 813080, 790423, 811614	30	97	13528	37.1904	8.07255e-07	8.07256e-08	1.6344e-06
GOTERM_BP_FAT	GO:0002696~positive regulation of leukocyte activation	8	21.6216	2.0104e-09	825577, 786246, 792681, 818161, 819682, 813080, 790423, 811614	30	106	13528	34.0327	1.51182e-06	1.37438e-07	3.06088e-06
GOTERM_BP_FAT	GO:0050867~positive regulation of cell activation	8	21.6216	2.78185e-09	825577, 786246, 792681, 818161, 819682, 813080, 790423, 811614	30	111	13528	32.4997	2.09195e-06	1.74329e-07	4.23542e-06
GOTERM_BP_FAT	GO:0042102~positive regulation of T cell proliferation	6	16.2162	1.72331e-08	825577, 786246, 818161, 819682, 813080, 811614	30	39	13528	69.3744	1.29592e-05	9.96868e-07	2.62378e-05
GOTERM_BP_FAT	GO:0002697~regulation of immune effector process	7	18.9189	6.16206e-08	802109, 825577, 792681, 819682, 813080, 790423, 811614	30	101	13528	31.2528	4.63376e-05	3.3099e-06	9.38187e-05
GOTERM_BP_FAT	GO:0050671~positive regulation of lymphocyte proliferation	6	16.2162	1.01685e-07	825577, 786246, 818161, 819682, 813080, 811614	30	55	13528	49.1927	7.64639e-05	5.09778e-06	0.000154817
GOTERM_BP_FAT	GO:0070665~positive regulation of leukocyte proliferation	6	16.2162	1.11488e-07	825577, 786246, 818161, 819682, 813080, 811614	30	56	13528	48.3143	8.38358e-05	5.23994e-06	0.000169744
GOTERM_BP_FAT	GO:0032946~positive regulation of mononuclear cell proliferation	6	16.2162	1.11488e-07	825577, 786246, 818161, 819682, 813080, 811614	30	56	13528	48.3143	8.38358e-05	5.23994e-06	0.000169744
GOTERM_BP_FAT	GO:0002703~regulation of leukocyte mediated immunity	6	16.2162	1.72355e-07	802109, 792681, 819682, 813080, 790423, 811614	30	61	13528	44.3541	0.000129603	7.62416e-06	0.000262415
GOTERM_BP_FAT	GO:0010627~regulation of protein kinase cascade	8	21.6216	7.26637e-07	786601, 802109, 825577, 786246, 819682, 813080, 790423, 815176	30	249	13528	14.4878	0.000546282	3.03568e-05	0.00110632
GOTERM_BP_FAT	GO:0001817~regulation of cytokine production	7	18.9189	1.94218e-06	802109, 825577, 786246, 819682, 813080, 790423, 811614	30	181	13528	17.4394	0.00145946	7.68667e-05	0.00295698
GOTERM_BP_FAT	GO:0002706~regulation of lymphocyte mediated immunity	5	13.5135	5.00089e-06	802109, 792681, 819682, 790423, 811614	30	54	13528	41.7531	0.00375361	0.000188016	0.00761369
GOTERM_BP_FAT	GO:0042110~T cell activation	6	16.2162	6.42541e-06	786246, 792681, 813080, 790423, 819946, 811614	30	126	13528	21.473	0.00482027	0.000230065	0.00978239
GOTERM_BP_FAT	GO:0045619~regulation of lymphocyte differentiation	5	13.5135	9.29465e-06	802109, 786246, 792681, 818161, 813080	30	63	13528	35.7884	0.00696524	0.000317659	0.0141504
GOTERM_BP_FAT	GO:0050730~regulation of peptidyl-tyrosine phosphorylation	5	13.5135	1.26138e-05	786601, 825577, 819682, 813080, 815176	30	68	13528	33.1569	0.00944082	0.000412335	0.0192031
GOTERM_BP_FAT	GO:0001775~cell activation	7	18.9189	2.72494e-05	825577, 786246, 792681, 813080, 790423, 819946, 811614	30	287	13528	10.9984	0.0202833	0.000853461	0.0414797
GOTERM_BP_FAT	GO:0002237~response to molecule of bacterial origin	5	13.5135	3.20267e-05	818576, 786601, 825577, 819682, 790423	30	86	13528	26.2171	0.0237968	0.000962916	0.0487503
GOTERM_BP_FAT	GO:0042509~regulation of tyrosine phosphorylation of STAT protein	4	10.8108	3.82392e-05	786601, 825577, 819682, 815176	30	31	13528	58.1849	0.0283469	0.00110541	0.0582042
GOTERM_BP_FAT	GO:0001819~positive regulation of cytokine production	5	13.5135	3.83091e-05	825577, 786246, 819682, 790423, 811614	30	90	13528	25.0519	0.028398	0.00106643	0.0583106
GOTERM_BP_FAT	GO:0032268~regulation of cellular protein metabolic process	8	21.6216	4.95105e-05	818576, 786601, 802109, 825577, 792823, 819682, 813080, 815176	30	474	13528	7.61069	0.0365482	0.00132886	0.0753543
GOTERM_BP_FAT	GO:0046649~lymphocyte activation	6	16.2162	5.83636e-05	786246, 792681, 813080, 790423, 819946, 811614	30	199	13528	13.596	0.0429414	0.00151233	0.088823
GOTERM_BP_FAT	GO:0046425~regulation of JAK-STAT cascade	4	10.8108	6.03043e-05	786601, 825577, 819682, 815176	30	36	13528	50.1037	0.0443372	0.00151053	0.0917752
GOTERM_BP_FAT	GO:0030098~lymphocyte differentiation	5	13.5135	6.50237e-05	786246, 792681, 813080, 790423, 811614	30	103	13528	21.89	0.0477231	0.00157616	0.0989543
GOTERM_BP_FAT	GO:0002699~positive regulation of immune effector process	4	10.8108	0.000110577	819682, 813080, 790423, 811614	30	44	13528	40.9939	0.0797944	0.00259532	0.168223
GOTERM_BP_FAT	GO:0048584~positive regulation of response to stimulus	6	16.2162	0.000130625	818576, 825577, 819682, 813080, 790423, 811614	30	236	13528	11.4644	0.0935657	0.00297244	0.198695
GOTERM_BP_FAT	GO:0045321~leukocyte activation	6	16.2162	0.000146938	786246, 792681, 813080, 790423, 819946, 811614	30	242	13528	11.1802	0.104618	0.00324488	0.223482
GOTERM_BP_FAT	GO:0051247~positive regulation of protein metabolic process	6	16.2162	0.000149802	818576, 802109, 825577, 819682, 813080, 819946	30	243	13528	11.1342	0.106545	0.00321366	0.227834
GOTERM_BP_FAT	GO:0002521~leukocyte differentiation	5	13.5135	0.000165324	786246, 792681, 813080, 790423, 811614	30	131	13528	17.2112	0.116915	0.00344775	0.251413
GOTERM_BP_FAT	GO:0050864~regulation of B cell activation	4	10.8108	0.000172127	802109, 825577, 786246, 813080	30	51	13528	35.3673	0.121422	0.00349256	0.261747
GOTERM_BP_FAT	GO:0045580~regulation of T cell differentiation	4	10.8108	0.000172127	786246, 792681, 818161, 813080	30	51	13528	35.3673	0.121422	0.00349256	0.261747
GOTERM_BP_FAT	GO:0042127~regulation of cell proliferation	9	24.3243	0.000181846	818576, 802109, 825577, 786246, 818161, 819682, 813080, 819946, 811614	30	787	13528	5.1568	0.127821	0.0035925	0.276507
GOTERM_BP_FAT	GO:0008284~positive regulation of cell proliferation	7	18.9189	0.00020689	818576, 825577, 786246, 818161, 819682, 813080, 811614	30	414	13528	7.62448	0.144096	0.00398173	0.314531
GOTERM_BP_FAT	GO:0002822~regulation of adaptive immune response based on somatic recombination of immune receptors built from immunoglobulin superfamily domains	4	10.8108	0.000215598	802109, 792681, 819682, 790423	30	55	13528	32.7952	0.149684	0.00404547	0.32775
GOTERM_BP_FAT	GO:0002819~regulation of adaptive immune response	4	10.8108	0.000227474	802109, 792681, 819682, 790423	30	56	13528	32.2095	0.157246	0.00416398	0.345774
GOTERM_BP_FAT	GO:0050778~positive regulation of immune response	5	13.5135	0.000244163	818576, 819682, 813080, 790423, 811614	30	145	13528	15.5494	0.167759	0.00436267	0.371099
GOTERM_BP_FAT	GO:0010604~positive regulation of macromolecule metabolic process	9	24.3243	0.000326113	818576, 802109, 825577, 786246, 819682, 813080, 819946, 811614, 813650	30	857	13528	4.73559	0.217512	0.00568788	0.495365
GOTERM_BP_FAT	GO:0030217~T cell differentiation	4	10.8108	0.000353829	786246, 792681, 813080, 811614	30	65	13528	27.7497	0.233658	0.00603008	0.537359
GOTERM_BP_FAT	GO:0031399~regulation of protein modification process	6	16.2162	0.000368294	786601, 802109, 825577, 819682, 813080, 815176	30	295	13528	9.17153	0.241951	0.00613682	0.559269
GOTERM_BP_FAT	GO:0009967~positive regulation of signal transduction	6	16.2162	0.000368294	802109, 825577, 786246, 819682, 813080, 790423	30	295	13528	9.17153	0.241951	0.00613682	0.559269
GOTERM_BP_FAT	GO:0010740~positive regulation of protein kinase cascade	5	13.5135	0.00041816	802109, 825577, 786246, 819682, 790423	30	167	13528	13.501	0.269862	0.00681412	0.634768
GOTERM_BP_FAT	GO:0019221~cytokine-mediated signaling pathway	4	10.8108	0.000440241	786601, 825577, 803212, 813650	30	70	13528	25.7676	0.281891	0.00702065	0.668182
GOTERM_BP_FAT	GO:0001932~regulation of protein amino acid phosphorylation	5	13.5135	0.00047792	786601, 825577, 819682, 813080, 815176	30	173	13528	13.0328	0.301962	0.00746123	0.725176
GOTERM_BP_FAT	GO:0042035~regulation of cytokine biosynthetic process	4	10.8108	0.000518348	825577, 786246, 813080, 811614	30	74	13528	24.3748	0.322875	0.00792555	0.786294
GOTERM_BP_FAT	GO:0042516~regulation of tyrosine phosphorylation of Stat3 protein	3	8.10811	0.00059155	786601, 825577, 815176	30	17	13528	79.5765	0.359161	0.00886006	0.896869
GOTERM_BP_FAT	GO:0010647~positive regulation of cell communication	6	16.2162	0.000606212	802109, 825577, 786246, 819682, 813080, 790423	30	329	13528	8.22371	0.366192	0.00890151	0.919003
GOTERM_BP_FAT	GO:0009617~response to bacterium	5	13.5135	0.000721329	818576, 786601, 825577, 819682, 790423	30	193	13528	11.6822	0.418785	0.010381	1.09262
GOTERM_BP_FAT	GO:0002683~negative regulation of immune system process	4	10.8108	0.000725252	802109, 792681, 818161, 819946	30	83	13528	21.7317	0.420499	0.0102413	1.09853
GOTERM_BP_FAT	GO:0002709~regulation of T cell mediated immunity	3	8.10811	0.00090858	792681, 819682, 790423	30	21	13528	64.419	0.495185	0.0125788	1.37443
GOTERM_BP_FAT	GO:0008285~negative regulation of cell proliferation	6	16.2162	0.000921869	802109, 825577, 818161, 819682, 819946, 811614	30	361	13528	7.49474	0.500209	0.0125311	1.3944
GOTERM_BP_FAT	GO:0007243~protein kinase cascade	6	16.2162	0.00102947	818576, 789232, 786601, 813080, 790423, 813650	30	370	13528	7.31243	0.539095	0.0137363	1.55597
GOTERM_BP_FAT	GO:0048585~negative regulation of response to stimulus	4	10.8108	0.00124554	786601, 802109, 792681, 818161	30	100	13528	18.0373	0.608289	0.0163082	1.87966
GOTERM_BP_FAT	GO:0001910~regulation of leukocyte mediated cytotoxicity	3	8.10811	0.00129109	792681, 819682, 811614	30	25	13528	54.112	0.621496	0.016611	1.94777
GOTERM_BP_FAT	GO:0032270~positive regulation of cellular protein metabolic process	5	13.5135	0.00145205	818576, 802109, 825577, 819682, 813080	30	233	13528	9.67668	0.664701	0.0183505	2.18809
GOTERM_BP_FAT	GO:0042130~negative regulation of T cell proliferation	3	8.10811	0.00150657	802109, 818161, 819946	30	27	13528	50.1037	0.67819	0.0187192	2.26937
GOTERM_BP_FAT	GO:0030097~hemopoiesis	5	13.5135	0.00152203	786246, 792681, 813080, 790423, 811614	30	236	13528	9.55367	0.681915	0.0186024	2.2924
GOTERM_BP_FAT	GO:0031341~regulation of cell killing	3	8.10811	0.00162031	792681, 819682, 811614	30	28	13528	48.3143	0.70461	0.0194765	2.43872
GOTERM_BP_FAT	GO:0051240~positive regulation of multicellular organismal process	5	13.5135	0.00172013	825577, 786246, 819682, 790423, 811614	30	244	13528	9.24044	0.726008	0.0203404	2.58714
GOTERM_BP_FAT	GO:0070664~negative regulation of leukocyte proliferation	3	8.10811	0.00211486	802109, 818161, 819946	30	32	13528	42.275	0.796493	0.024569	3.17193
GOTERM_BP_FAT	GO:0032945~negative regulation of mononuclear cell proliferation	3	8.10811	0.00211486	802109, 818161, 819946	30	32	13528	42.275	0.796493	0.024569	3.17193
GOTERM_BP_FAT	GO:0050672~negative regulation of lymphocyte proliferation	3	8.10811	0.00211486	802109, 818161, 819946	30	32	13528	42.275	0.796493	0.024569	3.17193
GOTERM_BP_FAT	GO:0045582~positive regulation of T cell differentiation	3	8.10811	0.00211486	792681, 818161, 813080	30	32	13528	42.275	0.796493	0.024569	3.17193
GOTERM_BP_FAT	GO:0048534~hemopoietic or lymphoid organ development	5	13.5135	0.00216914	786246, 792681, 813080, 790423, 811614	30	260	13528	8.67179	0.80465	0.0248095	3.25209
GOTERM_BP_FAT	GO:0050871~positive regulation of B cell activation	3	8.10811	0.00224831	825577, 786246, 813080	30	33	13528	40.9939	0.815966	0.0253199	3.36891
GOTERM_BP_FAT	GO:0050851~antigen receptor-mediated signaling pathway	3	8.10811	0.00224831	818576, 813080, 790423	30	33	13528	40.9939	0.815966	0.0253199	3.36891
GOTERM_BP_FAT	GO:0002708~positive regulation of lymphocyte mediated immunity	3	8.10811	0.00238566	819682, 790423, 811614	30	34	13528	39.7882	0.834066	0.0264522	3.57124
GOTERM_BP_FAT	GO:0002705~positive regulation of leukocyte mediated immunity	3	8.10811	0.00238566	819682, 790423, 811614	30	34	13528	39.7882	0.834066	0.0264522	3.57124
GOTERM_BP_FAT	GO:0045621~positive regulation of lymphocyte differentiation	3	8.10811	0.0025269	792681, 818161, 813080	30	35	13528	38.6514	0.850824	0.027592	3.77887
GOTERM_BP_FAT	GO:0016477~cell migration	5	13.5135	0.00269367	787961, 825577, 819682, 813080, 811614	30	276	13528	8.16908	0.86845	0.0289688	4.02352
GOTERM_BP_FAT	GO:0002520~immune system development	5	13.5135	0.00269367	786246, 792681, 813080, 790423, 811614	30	276	13528	8.16908	0.86845	0.0289688	4.02352
GOTERM_BP_FAT	GO:0042325~regulation of phosphorylation	6	16.2162	0.00284339	786601, 825577, 819682, 813080, 790423, 815176	30	466	13528	5.80601	0.882495	0.0301265	4.24266
GOTERM_BP_FAT	GO:0006955~immune response	7	18.9189	0.00298769	825577, 792681, 818161, 819682, 790423, 819946, 811614	30	690	13528	4.57469	0.894612	0.0311947	4.45343
GOTERM_BP_FAT	GO:0006928~cell motion	6	16.2162	0.00308833	787961, 825577, 819682, 813080, 811614, 813650	30	475	13528	5.696	0.902316	0.0317896	4.60016
GOTERM_BP_FAT	GO:0002429~immune response-activating cell surface receptor signaling pathway	3	8.10811	0.00313029	818576, 813080, 790423	30	39	13528	34.6872	0.905359	0.0317808	4.66127
GOTERM_BP_FAT	GO:0051174~regulation of phosphorus metabolic process	6	16.2162	0.00337814	786601, 825577, 819682, 813080, 790423, 815176	30	485	13528	5.57856	0.9215	0.0338028	5.02153
GOTERM_BP_FAT	GO:0019220~regulation of phosphate metabolic process	6	16.2162	0.00337814	786601, 825577, 819682, 813080, 790423, 815176	30	485	13528	5.57856	0.9215	0.0338028	5.02153
GOTERM_BP_FAT	GO:0051092~positive regulation of NF-kappaB transcription factor activity	3	8.10811	0.00345484	825577, 786246, 790423	30	41	13528	32.9951	0.925915	0.0341054	5.13277
GOTERM_BP_FAT	GO:0002700~regulation of production of molecular mediator of immune response	3	8.10811	0.00345484	802109, 825577, 790423	30	41	13528	32.9951	0.925915	0.0341054	5.13277
GOTERM_BP_FAT	GO:0002768~immune response-regulating cell surface receptor signaling pathway	3	8.10811	0.00362278	818576, 813080, 790423	30	42	13528	32.2095	0.934733	0.0352743	5.37588
GOTERM_BP_FAT	GO:0050868~negative regulation of T cell activation	3	8.10811	0.00362278	802109, 818161, 819946	30	42	13528	32.2095	0.934733	0.0352743	5.37588
GOTERM_BP_FAT	GO:0010033~response to organic substance	7	18.9189	0.00371713	818576, 786601, 825577, 792823, 819682, 790423, 813650	30	721	13528	4.37799	0.93922	0.0357165	5.51221
GOTERM_BP_FAT	GO:0051674~localization of cell	5	13.5135	0.00394753	787961, 825577, 819682, 813080, 811614	30	307	13528	7.34419	0.948923	0.0374156	5.84435
GOTERM_BP_FAT	GO:0048870~cell motility	5	13.5135	0.00394753	787961, 825577, 819682, 813080, 811614	30	307	13528	7.34419	0.948923	0.0374156	5.84435
GOTERM_BP_FAT	GO:0048660~regulation of smooth muscle cell proliferation	3	8.10811	0.00433188	825577, 819682, 811614	30	46	13528	29.4087	0.96179	0.0404824	6.396
GOTERM_BP_FAT	GO:0050731~positive regulation of peptidyl-tyrosine phosphorylation	3	8.10811	0.00451841	825577, 819682, 813080	30	47	13528	28.783	0.966811	0.041676	6.66264
GOTERM_BP_FAT	GO:0042108~positive regulation of cytokine biosynthetic process	3	8.10811	0.00470863	786246, 813080, 811614	30	48	13528	28.1833	0.971254	0.0428718	6.93381
GOTERM_BP_FAT	GO:0002757~immune response-activating signal transduction	3	8.10811	0.00550589	818576, 813080, 790423	30	52	13528	26.0154	0.984265	0.0493721	8.0624
GOTERM_BP_FAT	GO:0051250~negative regulation of lymphocyte activation	3	8.10811	0.00592616	802109, 818161, 819946	30	54	13528	25.0519	0.98855	0.0524279	8.65217
GOTERM_BP_FAT	GO:0042981~regulation of apoptosis	7	18.9189	0.00632858	818576, 825577, 786246, 818161, 819682, 790423, 811614	30	804	13528	3.92604	0.991555	0.0552509	9.21356
GOTERM_BP_FAT	GO:0002764~immune response-regulating signal transduction	3	8.10811	0.0063607	818576, 813080, 790423	30	56	13528	24.1571	0.991758	0.0548893	9.25823
GOTERM_BP_FAT	GO:0010661~positive regulation of muscle cell apoptosis	2	5.40541	0.0064178	819682, 811614	30	3	13528	300.622	0.992107	0.0547438	9.33759
GOTERM_BP_FAT	GO:0070102~interleukin-6-mediated signaling pathway	2	5.40541	0.0064178	825577, 813650	30	3	13528	300.622	0.992107	0.0547438	9.33759
GOTERM_BP_FAT	GO:0034393~positive regulation of smooth muscle cell apoptosis	2	5.40541	0.0064178	819682, 811614	30	3	13528	300.622	0.992107	0.0547438	9.33759
GOTERM_BP_FAT	GO:0002695~negative regulation of leukocyte activation	3	8.10811	0.00658328	802109, 818161, 819946	30	57	13528	23.7333	0.993036	0.0554927	9.56722
GOTERM_BP_FAT	GO:0043067~regulation of programmed cell death	7	18.9189	0.00663741	818576, 825577, 786246, 818161, 819682, 790423, 811614	30	812	13528	3.88736	0.993316	0.0553198	9.64221
GOTERM_BP_FAT	GO:0010941~regulation of cell death	7	18.9189	0.00675604	818576, 825577, 786246, 818161, 819682, 790423, 811614	30	815	13528	3.87305	0.99389	0.055669	9.80637
GOTERM_BP_FAT	GO:0051091~positive regulation of transcription factor activity	3	8.10811	0.00727208	825577, 786246, 790423	30	60	13528	22.5467	0.995866	0.059162	10.5172
GOTERM_BP_FAT	GO:0031401~positive regulation of protein modification process	4	10.8108	0.00729157	802109, 825577, 819682, 813080	30	187	13528	9.64563	0.995927	0.0586839	10.5439
GOTERM_BP_FAT	GO:0009725~response to hormone stimulus	5	13.5135	0.00740189	818576, 786601, 825577, 792823, 813650	30	367	13528	6.14351	0.996253	0.0589203	10.6952
GOTERM_BP_FAT	GO:0050866~negative regulation of cell activation	3	8.10811	0.00750865	802109, 818161, 819946	30	61	13528	22.177	0.996545	0.0591243	10.8413
GOTERM_BP_FAT	GO:0048545~response to steroid hormone stimulus	4	10.8108	0.00783924	818576, 786601, 825577, 813650	30	192	13528	9.39444	0.99731	0.06102	11.2924
GOTERM_BP_FAT	GO:0006952~defense response	6	16.2162	0.00916198	825577, 818161, 794951, 819682, 790423, 813650	30	615	13528	4.39935	0.999014	0.0702677	13.076
GOTERM_BP_FAT	GO:0043388~positive regulation of DNA binding	3	8.10811	0.00979175	825577, 786246, 790423	30	70	13528	19.3257	0.999389	0.0741843	13.9134
GOTERM_BP_FAT	GO:0009719~response to endogenous stimulus	5	13.5135	0.0103946	818576, 786601, 825577, 792823, 813650	30	405	13528	5.56708	0.999613	0.0778121	14.7078
GOTERM_BP_FAT	GO:0031349~positive regulation of defense response	3	8.10811	0.0106132	825577, 819682, 811614	30	73	13528	18.5315	0.999672	0.0786133	14.9943
GOTERM_BP_FAT	GO:0034391~regulation of smooth muscle cell apoptosis	2	5.40541	0.0106742	819682, 811614	30	5	13528	180.373	0.999687	0.0782828	15.0741
GOTERM_BP_FAT	GO:0050727~regulation of inflammatory response	3	8.10811	0.0114643	802109, 825577, 818161	30	76	13528	17.8	0.999828	0.0830563	16.1008
GOTERM_BP_FAT	GO:0032496~response to lipopolysaccharide	3	8.10811	0.0117544	818576, 786601, 819682	30	77	13528	17.5688	0.999862	0.0842727	16.475
GOTERM_BP_FAT	GO:0010557~positive regulation of macromolecule biosynthetic process	6	16.2162	0.0117661	818576, 825577, 786246, 813080, 811614, 813650	30	654	13528	4.137	0.999864	0.0835615	16.49
GOTERM_BP_FAT	GO:0051099~positive regulation of binding	3	8.10811	0.0120479	825577, 786246, 790423	30	78	13528	17.3436	0.99989	0.0846925	16.8518
GOTERM_BP_FAT	GO:0045597~positive regulation of cell differentiation	4	10.8108	0.0126474	825577, 792681, 818161, 813080	30	229	13528	7.87656	0.99993	0.0879258	17.6168
GOTERM_BP_FAT	GO:0002860~positive regulation of natural killer cell mediated cytotoxicity directed against tumor cell target	2	5.40541	0.0127958	819682, 811614	30	6	13528	150.311	0.999938	0.0881081	17.8051
GOTERM_BP_FAT	GO:0002857~positive regulation of natural killer cell mediated immune response to tumor cell	2	5.40541	0.0127958	819682, 811614	30	6	13528	150.311	0.999938	0.0881081	17.8051
GOTERM_BP_FAT	GO:0002858~regulation of natural killer cell mediated cytotoxicity directed against tumor cell target	2	5.40541	0.0127958	819682, 811614	30	6	13528	150.311	0.999938	0.0881081	17.8051
GOTERM_BP_FAT	GO:0002855~regulation of natural killer cell mediated immune response to tumor cell	2	5.40541	0.0127958	819682, 811614	30	6	13528	150.311	0.999938	0.0881081	17.8051
GOTERM_BP_FAT	GO:0031328~positive regulation of cellular biosynthetic process	6	16.2162	0.0141706	818576, 825577, 786246, 813080, 811614, 813650	30	685	13528	3.94978	0.999978	0.0962929	19.5306
GOTERM_BP_FAT	GO:0007242~intracellular signaling cascade	8	21.6216	0.0147514	818576, 789232, 786601, 792823, 813080, 790423, 819946, 813650	30	1256	13528	2.87219	0.999986	0.0991764	20.2495
GOTERM_BP_FAT	GO:0032816~positive regulation of natural killer cell activation	2	5.40541	0.014913	819682, 811614	30	7	13528	128.838	0.999988	0.0993342	20.4484
GOTERM_BP_FAT	GO:0032814~regulation of natural killer cell activation	2	5.40541	0.014913	819682, 811614	30	7	13528	128.838	0.999988	0.0993342	20.4484
GOTERM_BP_FAT	GO:0009891~positive regulation of biosynthetic process	6	16.2162	0.0150128	818576, 825577, 786246, 813080, 811614, 813650	30	695	13528	3.89295	0.999989	0.0990992	20.571
GOTERM_BP_FAT	GO:0001934~positive regulation of protein amino acid phosphorylation	3	8.10811	0.0154844	825577, 819682, 813080	30	89	13528	15.2	0.999992	0.101191	21.148
GOTERM_BP_FAT	GO:0002837~regulation of immune response to tumor cell	2	5.40541	0.0170259	819682, 811614	30	8	13528	112.733	0.999998	0.109827	23.0069
GOTERM_BP_FAT	GO:0002834~regulation of response to tumor cell	2	5.40541	0.0170259	819682, 811614	30	8	13528	112.733	0.999998	0.109827	23.0069
GOTERM_BP_FAT	GO:0002836~positive regulation of response to tumor cell	2	5.40541	0.0170259	819682, 811614	30	8	13528	112.733	0.999998	0.109827	23.0069
GOTERM_BP_FAT	GO:0010660~regulation of muscle cell apoptosis	2	5.40541	0.0170259	819682, 811614	30	8	13528	112.733	0.999998	0.109827	23.0069
GOTERM_BP_FAT	GO:0002839~positive regulation of immune response to tumor cell	2	5.40541	0.0170259	819682, 811614	30	8	13528	112.733	0.999998	0.109827	23.0069
GOTERM_BP_FAT	GO:0002833~positive regulation of response to biotic stimulus	2	5.40541	0.0170259	819682, 811614	30	8	13528	112.733	0.999998	0.109827	23.0069
GOTERM_BP_FAT	GO:0010224~response to UV-B	2	5.40541	0.0170259	819682, 811614	30	8	13528	112.733	0.999998	0.109827	23.0069
GOTERM_BP_FAT	GO:0002253~activation of immune response	3	8.10811	0.01717	818576, 813080, 790423	30	94	13528	14.3915	0.999998	0.109779	23.1786
GOTERM_BP_FAT	GO:0043123~positive regulation of I-kappaB kinase/NF-kappaB cascade	3	8.10811	0.0182174	802109, 786246, 790423	30	97	13528	13.9464	0.999999	0.115163	24.4157
GOTERM_BP_FAT	GO:0042327~positive regulation of phosphorylation	3	8.10811	0.0182174	825577, 819682, 813080	30	97	13528	13.9464	0.999999	0.115163	24.4157
GOTERM_BP_FAT	GO:0010605~negative regulation of macromolecule metabolic process	6	16.2162	0.0186229	786601, 802109, 825577, 816186, 792823, 813650	30	734	13528	3.6861	0.999999	0.116624	24.8896
GOTERM_BP_FAT	GO:0050853~B cell receptor signaling pathway	2	5.40541	0.0191343	818576, 813080	30	9	13528	100.207	1	0.11868	25.4833
GOTERM_BP_FAT	GO:0001914~regulation of T cell mediated cytotoxicity	2	5.40541	0.0191343	792681, 819682	30	9	13528	100.207	1	0.11868	25.4833
GOTERM_BP_FAT	GO:0042104~positive regulation of activated T cell proliferation	2	5.40541	0.0191343	818161, 811614	30	9	13528	100.207	1	0.11868	25.4833
GOTERM_BP_FAT	GO:0048872~homeostasis of number of cells	3	8.10811	0.0192914	825577, 792681, 818161	30	100	13528	13.528	1	0.118635	25.6648
GOTERM_BP_FAT	GO:0010562~positive regulation of phosphorus metabolic process	3	8.10811	0.0192914	825577, 819682, 813080	30	100	13528	13.528	1	0.118635	25.6648
GOTERM_BP_FAT	GO:0045937~positive regulation of phosphate metabolic process	3	8.10811	0.0192914	825577, 819682, 813080	30	100	13528	13.528	1	0.118635	25.6648
GOTERM_BP_FAT	GO:0051090~regulation of transcription factor activity	3	8.10811	0.0203915	825577, 786246, 790423	30	103	13528	13.134	1	0.124025	26.9243
GOTERM_BP_FAT	GO:0043627~response to estrogen stimulus	3	8.10811	0.0211394	818576, 786601, 813650	30	105	13528	12.8838	1	0.1273	27.7691
GOTERM_BP_FAT	GO:0051094~positive regulation of developmental process	4	10.8108	0.0211482	825577, 792681, 818161, 813080	30	278	13528	6.48825	1	0.12635	27.779
GOTERM_BP_FAT	GO:0050856~regulation of T cell receptor signaling pathway	2	5.40541	0.0212384	790423, 819946	30	10	13528	90.1867	1	0.125871	27.8803
GOTERM_BP_FAT	GO:0043122~regulation of I-kappaB kinase/NF-kappaB cascade	3	8.10811	0.0218986	802109, 786246, 790423	30	107	13528	12.643	1	0.128561	28.6174
GOTERM_BP_FAT	GO:0002823~negative regulation of adaptive immune response based on somatic recombination of immune receptors built from immunoglobulin superfamily domains	2	5.40541	0.0233381	802109, 792681	30	11	13528	81.9879	1	0.135462	30.2003
GOTERM_BP_FAT	GO:0002820~negative regulation of adaptive immune response	2	5.40541	0.0233381	802109, 792681	30	11	13528	81.9879	1	0.135462	30.2003
GOTERM_BP_FAT	GO:0032729~positive regulation of interferon-gamma production	2	5.40541	0.0233381	819682, 811614	30	11	13528	81.9879	1	0.135462	30.2003
GOTERM_BP_FAT	GO:0046006~regulation of activated T cell proliferation	2	5.40541	0.0254335	818161, 811614	30	12	13528	75.1556	1	0.14573	32.4458
GOTERM_BP_FAT	GO:0050854~regulation of antigen receptor-mediated signaling pathway	2	5.40541	0.0254335	790423, 819946	30	12	13528	75.1556	1	0.14573	32.4458
GOTERM_BP_FAT	GO:0051101~regulation of DNA binding	3	8.10811	0.0275233	825577, 786246, 790423	30	121	13528	11.1802	1	0.155707	34.618
GOTERM_BP_FAT	GO:0046640~regulation of alpha-beta T cell proliferation	2	5.40541	0.0275245	813080, 819946	30	13	13528	69.3744	1	0.154569	34.6193
GOTERM_BP_FAT	GO:0046632~alpha-beta T cell differentiation	2	5.40541	0.0296112	813080, 811614	30	14	13528	64.419	1	0.164226	36.723
GOTERM_BP_FAT	GO:0048662~negative regulation of smooth muscle cell proliferation	2	5.40541	0.0296112	819682, 811614	30	14	13528	64.419	1	0.164226	36.723
GOTERM_BP_FAT	GO:0002711~positive regulation of T cell mediated immunity	2	5.40541	0.0316936	819682, 790423	30	15	13528	60.1244	1	0.173623	38.7591
GOTERM_BP_FAT	GO:0045577~regulation of B cell differentiation	2	5.40541	0.0337717	786246, 813080	30	16	13528	56.3667	1	0.182771	40.7299
GOTERM_BP_FAT	GO:0002717~positive regulation of natural killer cell mediated immunity	2	5.40541	0.0337717	819682, 811614	30	16	13528	56.3667	1	0.182771	40.7299
GOTERM_BP_FAT	GO:0045954~positive regulation of natural killer cell mediated cytotoxicity	2	5.40541	0.0337717	819682, 811614	30	16	13528	56.3667	1	0.182771	40.7299
GOTERM_BP_FAT	GO:0006417~regulation of translation	3	8.10811	0.0345841	818576, 825577, 792823	30	137	13528	9.87445	1	0.185495	41.4841
GOTERM_BP_FAT	GO:0032880~regulation of protein localization	3	8.10811	0.0350467	787961, 802109, 825577	30	138	13528	9.8029	1	0.186468	41.9096
GOTERM_BP_FAT	GO:0002715~regulation of natural killer cell mediated immunity	2	5.40541	0.0358454	819682, 811614	30	17	13528	53.051	1	0.189049	42.6373
GOTERM_BP_FAT	GO:0042269~regulation of natural killer cell mediated cytotoxicity	2	5.40541	0.0358454	819682, 811614	30	17	13528	53.051	1	0.189049	42.6373
GOTERM_BP_FAT	GO:0007166~cell surface receptor linked signal transduction	9	24.3243	0.0370381	818576, 792681, 818161, 792823, 813080, 790423, 819946, 811614, 813650	30	1856	13528	2.18664	1	0.193468	43.7082
GOTERM_BP_FAT	GO:0046631~alpha-beta T cell activation	2	5.40541	0.0379149	813080, 811614	30	18	13528	50.1037	1	0.196313	44.4836
GOTERM_BP_FAT	GO:0045058~T cell selection	2	5.40541	0.0399801	786246, 813080	30	19	13528	47.4667	1	0.204651	46.2705
GOTERM_BP_FAT	GO:0050830~defense response to Gram-positive bacterium	2	5.40541	0.042041	825577, 819682	30	20	13528	45.0933	1	0.212781	48.0001
GOTERM_BP_FAT	GO:0051098~regulation of binding	3	8.10811	0.042272	825577, 786246, 790423	30	153	13528	8.84183	1	0.212446	48.1907
GOTERM_BP_FAT	GO:0043434~response to peptide hormone stimulus	3	8.10811	0.0427723	786601, 792823, 813650	30	154	13528	8.78442	1	0.213331	48.6012
GOTERM_BP_FAT	GO:0006913~nucleocytoplasmic transport	3	8.10811	0.0437795	818576, 790423, 819946	30	156	13528	8.67179	1	0.21647	49.4184
GOTERM_BP_FAT	GO:0001912~positive regulation of leukocyte mediated cytotoxicity	2	5.40541	0.0440976	819682, 811614	30	21	13528	42.946	1	0.216506	49.674
GOTERM_BP_FAT	GO:0051169~nuclear transport	3	8.10811	0.0447956	818576, 790423, 819946	30	158	13528	8.56203	1	0.218212	50.2307
GOTERM_BP_FAT	GO:0032101~regulation of response to external stimulus	3	8.10811	0.045307	802109, 825577, 818161	30	159	13528	8.50818	1	0.21908	50.6348
GOTERM_BP_FAT	GO:0006935~chemotaxis	3	8.10811	0.0458205	818576, 825577, 813080	30	160	13528	8.455	1	0.219945	51.0376
GOTERM_BP_FAT	GO:0042330~taxis	3	8.10811	0.0458205	818576, 825577, 813080	30	160	13528	8.455	1	0.219945	51.0376
GOTERM_BP_FAT	GO:0042531~positive regulation of tyrosine phosphorylation of STAT protein	2	5.40541	0.048198	825577, 819682	30	23	13528	39.2116	1	0.228773	52.8624
GOTERM_BP_FAT	GO:0050852~T cell receptor signaling pathway	2	5.40541	0.048198	818576, 790423	30	23	13528	39.2116	1	0.228773	52.8624
GOTERM_BP_FAT	GO:0045727~positive regulation of translation	2	5.40541	0.048198	818576, 825577	30	23	13528	39.2116	1	0.228773	52.8624
GOTERM_BP_FAT	GO:0031343~positive regulation of cell killing	2	5.40541	0.0502419	819682, 811614	30	24	13528	37.5778	1	0.236006	54.3802
GOTERM_BP_FAT	GO:0030334~regulation of cell migration	3	8.10811	0.0505398	818576, 825577, 824273	30	169	13528	8.00473	1	0.23583	54.5976
GOTERM_BP_FAT	GO:0050777~negative regulation of immune response	2	5.40541	0.0522815	802109, 792681	30	25	13528	36.0747	1	0.241627	55.8493
GOTERM_BP_FAT	GO:0000018~regulation of DNA recombination	2	5.40541	0.0543169	802109, 792681	30	26	13528	34.6872	1	0.24851	57.2711
GOTERM_BP_FAT	GO:0046427~positive regulation of JAK-STAT cascade	2	5.40541	0.0543169	825577, 819682	30	26	13528	34.6872	1	0.24851	57.2711
GOTERM_BP_FAT	GO:0002637~regulation of immunoglobulin production	2	5.40541	0.0543169	802109, 825577	30	26	13528	34.6872	1	0.24851	57.2711
GOTERM_BP_FAT	GO:0045732~positive regulation of protein catabolic process	2	5.40541	0.0563481	802109, 819946	30	27	13528	33.4025	1	0.255239	58.6472
GOTERM_BP_FAT	GO:0002831~regulation of response to biotic stimulus	2	5.40541	0.0603978	819682, 811614	30	29	13528	31.0989	1	0.269788	61.2683
GOTERM_BP_FAT	GO:0002824~positive regulation of adaptive immune response based on somatic recombination of immune receptors built from immunoglobulin superfamily domains	2	5.40541	0.0624163	819682, 790423	30	30	13528	30.0622	1	0.276103	62.516
GOTERM_BP_FAT	GO:0032649~regulation of interferon-gamma production	2	5.40541	0.0624163	819682, 811614	30	30	13528	30.0622	1	0.276103	62.516
GOTERM_BP_FAT	GO:0032663~regulation of interleukin-2 production	2	5.40541	0.0624163	786246, 790423	30	30	13528	30.0622	1	0.276103	62.516
GOTERM_BP_FAT	GO:0043065~positive regulation of apoptosis	4	10.8108	0.0633184	818576, 818161, 819682, 811614	30	430	13528	4.19473	1	0.278021	63.0613
GOTERM_BP_FAT	GO:0040012~regulation of locomotion	3	8.10811	0.0633507	818576, 825577, 824273	30	192	13528	7.04583	1	0.276596	63.0807
GOTERM_BP_FAT	GO:0051270~regulation of cell motion	3	8.10811	0.0639307	818576, 825577, 824273	30	193	13528	7.00933	1	0.277267	63.4273
GOTERM_BP_FAT	GO:0043068~positive regulation of programmed cell death	4	10.8108	0.0643826	818576, 818161, 819682, 811614	30	433	13528	4.16567	1	0.277447	63.6951
GOTERM_BP_FAT	GO:0002821~positive regulation of adaptive immune response	2	5.40541	0.0644307	819682, 790423	30	31	13528	29.0925	1	0.276111	63.7235
GOTERM_BP_FAT	GO:0050728~negative regulation of inflammatory response	2	5.40541	0.0644307	802109, 818161	30	31	13528	29.0925	1	0.276111	63.7235
GOTERM_BP_FAT	GO:0010942~positive regulation of cell death	4	10.8108	0.0650968	818576, 818161, 819682, 811614	30	435	13528	4.14651	1	0.277097	64.1148
GOTERM_BP_FAT	GO:0008283~cell proliferation	4	10.8108	0.0654554	792681, 818161, 813080, 790423	30	436	13528	4.137	1	0.276931	64.3238
GOTERM_BP_FAT	GO:0019233~sensory perception of pain	2	5.40541	0.0664409	818576, 811614	30	32	13528	28.1833	1	0.279075	64.8923
GOTERM_BP_FAT	GO:0042592~homeostatic process	5	13.5135	0.0743843	802109, 825577, 792681, 818161, 813650	30	751	13528	3.00222	1	0.306203	69.1752
GOTERM_BP_FAT	GO:0046634~regulation of alpha-beta T cell activation	2	5.40541	0.07444	813080, 819946	30	36	13528	25.0519	1	0.304813	69.2035
GOTERM_BP_FAT	GO:0031348~negative regulation of defense response	2	5.40541	0.07444	802109, 818161	30	36	13528	25.0519	1	0.304813	69.2035
GOTERM_BP_FAT	GO:0001776~leukocyte homeostasis	2	5.40541	0.07444	825577, 818161	30	36	13528	25.0519	1	0.304813	69.2035
GOTERM_BP_FAT	GO:0010608~posttranscriptional regulation of gene expression	3	8.10811	0.0746777	818576, 825577, 792823	30	211	13528	6.41137	1	0.304077	69.3237
GOTERM_BP_FAT	GO:0030595~leukocyte chemotaxis	2	5.40541	0.0764294	825577, 813080	30	37	13528	24.3748	1	0.308626	70.196
GOTERM_BP_FAT	GO:0007610~behavior	4	10.8108	0.0778032	818576, 825577, 813080, 813650	30	469	13528	3.84591	1	0.311801	70.8639
GOTERM_BP_FAT	GO:0007259~JAK-STAT cascade	2	5.40541	0.0803959	786601, 813650	30	39	13528	23.1248	1	0.319079	72.0864
GOTERM_BP_FAT	GO:0060326~cell chemotaxis	2	5.40541	0.0803959	825577, 813080	30	39	13528	23.1248	1	0.319079	72.0864
GOTERM_BP_FAT	GO:0009968~negative regulation of signal transduction	3	8.10811	0.0808852	786601, 819946, 824273	30	221	13528	6.12127	1	0.319145	72.3117
GOTERM_BP_FAT	GO:0006953~acute-phase response	2	5.40541	0.0823729	825577, 813650	30	40	13528	22.5467	1	0.322556	72.9863
GOTERM_BP_FAT	GO:0046651~lymphocyte proliferation	2	5.40541	0.0863148	792681, 790423	30	42	13528	21.473	1	0.334011	74.7001
GOTERM_BP_FAT	GO:0070661~leukocyte proliferation	2	5.40541	0.0902402	792681, 790423	30	44	13528	20.497	1	0.34514	76.3054
GOTERM_BP_FAT	GO:0032943~mononuclear cell proliferation	2	5.40541	0.0902402	792681, 790423	30	44	13528	20.497	1	0.34514	76.3054
GOTERM_BP_FAT	GO:0018108~peptidyl-tyrosine phosphorylation	2	5.40541	0.0941494	789232, 813080	30	46	13528	19.6058	1	0.355958	77.809
GOTERM_BP_FAT	GO:0045089~positive regulation of innate immune response	2	5.40541	0.0941494	819682, 811614	30	46	13528	19.6058	1	0.355958	77.809
GOTERM_BP_FAT	GO:0018212~peptidyl-tyrosine modification	2	5.40541	0.0980423	789232, 813080	30	48	13528	18.7889	1	0.366474	79.2174
GOTERM_BP_FAT	GO:0010648~negative regulation of cell communication	3	8.10811	0.0984068	786601, 819946, 824273	30	248	13528	5.45484	1	0.365908	79.3449
GOTERM_BP_FAT	GO:0009896~positive regulation of catabolic process	2	5.40541	0.0999827	802109, 819946	30	49	13528	18.4054	1	0.369071	79.8878

## Sheet: Z-score gene expression values
Adipocyte	-0.36407	Wdr23(DCAF11)
Adipocyte	0.26985	CDH2
Adipocyte	-0.6649	SP110
Adipocyte	-0.25841	FCRL3
Adipocyte	-0.49866	C12orf51
Adipocyte	0.25153	IL22RA2
Adipocyte	-0.5243	IL2RA
Adipocyte	0.6583	YPEL2
Adipocyte	0.2553	BCL9L
Adipocyte	1.03779	UBASH3B
Adipocyte	-0.78351	TYK2
Adipocyte	-0.54337	SYK
Adipocyte	-0.3576	CHST12
Adipocyte	-0.64935	EIF4EBP2
Adipocyte	-0.26796	ARAP3
Adipocyte	-0.31101	IL7R
Adipocyte	-0.25992	CUX2
Adipocyte	0.2553	RBM45
Adipocyte	0.51818	NDFIP1
Adipocyte	-0.49863	IL12B
Adipocyte	-0.61396	TRAFD1
Adipocyte	-0.5067	CARD11
Adipocyte	-0.32096	MAP3K14
Adipocyte	-0.41436	SP140
Adipocyte	0.87452	TMEM87B
Adipocyte	-0.341	IL6
Adipocyte	-0.40645	C12orf65
Adipocyte	1.1666	SLC30A7
Adipocyte	1.55068	STAT3
Adipocyte	-0.36171	IL20RA
Adipocyte	-0.4426	CBLB
Adipocyte	-0.39608	RPS25
Adipocyte	-0.59972	IQCB1
Adipocyte	-0.24453	SOCS1
Adipocyte	-0.36162	CSF2RB
Adipocyte	-0.60469	MALT1
Adipocyte	-0.37749	IL12A
Adipocyte	-0.33261	MAPK1
B lymphoblasts	-0.18718	Wdr23(DCAF11)
B lymphoblasts	-0.42148	CDH2
B lymphoblasts	0.23717	SP110
B lymphoblasts	-0.32675	FCRL3
B lymphoblasts	-0.3934	C12orf51
B lymphoblasts	-0.5021	IL22RA2
B lymphoblasts	0.58104	IL2RA
B lymphoblasts	-3.01471	YPEL2
B lymphoblasts	0.2553	BCL9L
B lymphoblasts	-1.13987	UBASH3B
B lymphoblasts	1.29614	TYK2
B lymphoblasts	-0.19203	SYK
B lymphoblasts	0.04562	CHST12
B lymphoblasts	0.41451	EIF4EBP2
B lymphoblasts	-0.22627	ARAP3
B lymphoblasts	-0.30986	IL7R
B lymphoblasts	-0.34219	CUX2
B lymphoblasts	0.2553	RBM45
B lymphoblasts	-0.91617	NDFIP1
B lymphoblasts	0.16621	IL12B
B lymphoblasts	1.76592	TRAFD1
B lymphoblasts	-0.00056	CARD11
B lymphoblasts	0.76236	MAP3K14
B lymphoblasts	0.68998	SP140
B lymphoblasts	-0.32482	TMEM87B
B lymphoblasts	0.69564	IL6
B lymphoblasts	1.82739	C12orf65
B lymphoblasts	-0.65148	SLC30A7
B lymphoblasts	0.13718	STAT3
B lymphoblasts	0.92246	IL20RA
B lymphoblasts	0.11839	CBLB
B lymphoblasts	0.75565	RPS25
B lymphoblasts	3.74525	IQCB1
B lymphoblasts	4.09742	SOCS1
B lymphoblasts	-0.30318	CSF2RB
B lymphoblasts	1.726	MALT1
B lymphoblasts	0.74758	IL12A
B lymphoblasts	4.60143	MAPK1
BDCA4+_DentriticCells	-0.09904	Wdr23(DCAF11)
BDCA4+_DentriticCells	-0.55173	CDH2
BDCA4+_DentriticCells	1.49301	SP110
BDCA4+_DentriticCells	-0.29258	FCRL3
BDCA4+_DentriticCells	-0.25187	C12orf51
BDCA4+_DentriticCells	-0.16374	IL22RA2
BDCA4+_DentriticCells	0.28497	IL2RA
BDCA4+_DentriticCells	-0.37858	YPEL2
BDCA4+_DentriticCells	0.2553	BCL9L
BDCA4+_DentriticCells	0.01701	UBASH3B
BDCA4+_DentriticCells	1.43611	TYK2
BDCA4+_DentriticCells	2.97762	SYK
BDCA4+_DentriticCells	0.83572	CHST12
BDCA4+_DentriticCells	0.10204	EIF4EBP2
BDCA4+_DentriticCells	-0.25102	ARAP3
BDCA4+_DentriticCells	-0.30214	IL7R
BDCA4+_DentriticCells	4.39102	CUX2
BDCA4+_DentriticCells	0.2553	RBM45
BDCA4+_DentriticCells	-0.43032	NDFIP1
BDCA4+_DentriticCells	-0.66483	IL12B
BDCA4+_DentriticCells	0.80453	TRAFD1
BDCA4+_DentriticCells	2.0105	CARD11
BDCA4+_DentriticCells	0.32903	MAP3K14
BDCA4+_DentriticCells	0.02888	SP140
BDCA4+_DentriticCells	-0.32482	TMEM87B
BDCA4+_DentriticCells	-0.0682	IL6
BDCA4+_DentriticCells	-0.37141	C12orf65
BDCA4+_DentriticCells	0.07575	SLC30A7
BDCA4+_DentriticCells	0.27864	STAT3
BDCA4+_DentriticCells	0.20333	IL20RA
BDCA4+_DentriticCells	-0.05006	CBLB
BDCA4+_DentriticCells	0.3344	RPS25
BDCA4+_DentriticCells	0.57227	IQCB1
BDCA4+_DentriticCells	-0.41699	SOCS1
BDCA4+_DentriticCells	1.45727	CSF2RB
BDCA4+_DentriticCells	1.58975	MALT1
BDCA4+_DentriticCells	-0.08142	IL12A
BDCA4+_DentriticCells	-0.05914	MAPK1
Bonemarrow	-0.08541	Wdr23(DCAF11)
Bonemarrow	-0.07401	CDH2
Bonemarrow	-0.62894	SP110
Bonemarrow	-0.24132	FCRL3
Bonemarrow	-0.36939	C12orf51
Bonemarrow	0.11311	IL22RA2
Bonemarrow	-0.15914	IL2RA
Bonemarrow	0.14865	YPEL2
Bonemarrow	0.2553	BCL9L
Bonemarrow	1.24194	UBASH3B
Bonemarrow	-0.75128	TYK2
Bonemarrow	-0.48068	SYK
Bonemarrow	-0.27033	CHST12
Bonemarrow	-0.44605	EIF4EBP2
Bonemarrow	-0.26796	ARAP3
Bonemarrow	-0.30366	IL7R
Bonemarrow	-0.26384	CUX2
Bonemarrow	0.2553	RBM45
Bonemarrow	-0.6633	NDFIP1
Bonemarrow	1.04474	IL12B
Bonemarrow	-0.44541	TRAFD1
Bonemarrow	-0.49995	CARD11
Bonemarrow	-0.32096	MAP3K14
Bonemarrow	-0.40121	SP140
Bonemarrow	0.87452	TMEM87B
Bonemarrow	-0.341	IL6
Bonemarrow	-0.47445	C12orf65
Bonemarrow	1.1666	SLC30A7
Bonemarrow	-0.07417	STAT3
Bonemarrow	-0.10487	IL20RA
Bonemarrow	-0.44353	CBLB
Bonemarrow	-0.94291	RPS25
Bonemarrow	-0.44921	IQCB1
Bonemarrow	-0.10758	SOCS1
Bonemarrow	-0.26313	CSF2RB
Bonemarrow	-0.59121	MALT1
Bonemarrow	-0.02221	IL12A
Bonemarrow	-0.27517	MAPK1
CD105+_Endothelial	0.33864	Wdr23(DCAF11)
CD105+_Endothelial	-0.46676	CDH2
CD105+_Endothelial	-0.60048	SP110
CD105+_Endothelial	-0.30966	FCRL3
CD105+_Endothelial	-0.17472	C12orf51
CD105+_Endothelial	-0.1176	IL22RA2
CD105+_Endothelial	-0.50456	IL2RA
CD105+_Endothelial	-0.09739	YPEL2
CD105+_Endothelial	0.2553	BCL9L
CD105+_Endothelial	0.01701	UBASH3B
CD105+_Endothelial	-0.37774	TYK2
CD105+_Endothelial	-0.53717	SYK
CD105+_Endothelial	-0.35502	CHST12
CD105+_Endothelial	0.70032	EIF4EBP2
CD105+_Endothelial	-0.25884	ARAP3
CD105+_Endothelial	-0.31091	IL7R
CD105+_Endothelial	-0.29257	CUX2
CD105+_Endothelial	0.2553	RBM45
CD105+_Endothelial	0.00794	NDFIP1
CD105+_Endothelial	-0.04749	IL12B
CD105+_Endothelial	-0.52362	TRAFD1
CD105+_Endothelial	-0.52695	CARD11
CD105+_Endothelial	-0.30955	MAP3K14
CD105+_Endothelial	-0.41342	SP140
CD105+_Endothelial	-0.32482	TMEM87B
CD105+_Endothelial	-0.28644	IL6
CD105+_Endothelial	1.4985	C12orf65
CD105+_Endothelial	0.07575	SLC30A7
CD105+_Endothelial	-1.26905	STAT3
CD105+_Endothelial	-0.15624	IL20RA
CD105+_Endothelial	-0.41942	CBLB
CD105+_Endothelial	0.75883	RPS25
CD105+_Endothelial	0.3317	IQCB1
CD105+_Endothelial	-0.39163	SOCS1
CD105+_Endothelial	-0.35411	CSF2RB
CD105+_Endothelial	-0.59838	MALT1
CD105+_Endothelial	-0.19985	IL12A
CD105+_Endothelial	-0.3236	MAPK1
CD14+_Monocytes	-0.14599	Wdr23(DCAF11)
CD14+_Monocytes	-0.37459	CDH2
CD14+_Monocytes	0.39387	SP110
CD14+_Monocytes	-0.29258	FCRL3
CD14+_Monocytes	-0.38727	C12orf51
CD14+_Monocytes	0.03621	IL22RA2
CD14+_Monocytes	0.03824	IL2RA
CD14+_Monocytes	1.95001	YPEL2
CD14+_Monocytes	0.2553	BCL9L
CD14+_Monocytes	0.49337	UBASH3B
CD14+_Monocytes	2.01806	TYK2
CD14+_Monocytes	0.85786	SYK
CD14+_Monocytes	-0.35201	CHST12
CD14+_Monocytes	1.57364	EIF4EBP2
CD14+_Monocytes	0.17753	ARAP3
CD14+_Monocytes	-0.31072	IL7R
CD14+_Monocytes	-0.24216	CUX2
CD14+_Monocytes	0.2553	RBM45
CD14+_Monocytes	-0.08032	NDFIP1
CD14+_Monocytes	-0.11872	IL12B
CD14+_Monocytes	2.73674	TRAFD1
CD14+_Monocytes	-0.51345	CARD11
CD14+_Monocytes	-0.28105	MAP3K14
CD14+_Monocytes	-0.39276	SP140
CD14+_Monocytes	0.27485	TMEM87B
CD14+_Monocytes	0.09548	IL6
CD14+_Monocytes	-0.19955	C12orf65
CD14+_Monocytes	0.43937	SLC30A7
CD14+_Monocytes	0.2532	STAT3
CD14+_Monocytes	0.20333	IL20RA
CD14+_Monocytes	-0.43796	CBLB
CD14+_Monocytes	0.07322	RPS25
CD14+_Monocytes	-0.41837	IQCB1
CD14+_Monocytes	-0.23439	SOCS1
CD14+_Monocytes	0.1166	CSF2RB
CD14+_Monocytes	-0.01549	MALT1
CD14+_Monocytes	0.09622	IL12A
CD14+_Monocytes	-0.10614	MAPK1
CD19+_BCells(neg._sel.)	-0.12478	Wdr23(DCAF11)
CD19+_BCells(neg._sel.)	-0.4355	CDH2
CD19+_BCells(neg._sel.)	3.22313	SP110
CD19+_BCells(neg._sel.)	3.20981	FCRL3
CD19+_BCells(neg._sel.)	0.42563	C12orf51
CD19+_BCells(neg._sel.)	-0.18681	IL22RA2
CD19+_BCells(neg._sel.)	-0.12953	IL2RA
CD19+_BCells(neg._sel.)	0.01684	YPEL2
CD19+_BCells(neg._sel.)	0.2553	BCL9L
CD19+_BCells(neg._sel.)	-0.32325	UBASH3B
CD19+_BCells(neg._sel.)	-0.03908	TYK2
CD19+_BCells(neg._sel.)	2.04484	SYK
CD19+_BCells(neg._sel.)	-0.30558	CHST12
CD19+_BCells(neg._sel.)	-0.63518	EIF4EBP2
CD19+_BCells(neg._sel.)	-0.27056	ARAP3
CD19+_BCells(neg._sel.)	-0.31062	IL7R
CD19+_BCells(neg._sel.)	-0.29048	CUX2
CD19+_BCells(neg._sel.)	0.2553	RBM45
CD19+_BCells(neg._sel.)	-0.66466	NDFIP1
CD19+_BCells(neg._sel.)	-0.33242	IL12B
CD19+_BCells(neg._sel.)	-0.41844	TRAFD1
CD19+_BCells(neg._sel.)	2.55713	CARD11
CD19+_BCells(neg._sel.)	4.52548	MAP3K14
CD19+_BCells(neg._sel.)	4.31288	SP140
CD19+_BCells(neg._sel.)	0.87452	TMEM87B
CD19+_BCells(neg._sel.)	0.2046	IL6
CD19+_BCells(neg._sel.)	0.58353	C12orf65
CD19+_BCells(neg._sel.)	-0.28786	SLC30A7
CD19+_BCells(neg._sel.)	-0.58411	STAT3
CD19+_BCells(neg._sel.)	0.04923	IL20RA
CD19+_BCells(neg._sel.)	-0.02533	CBLB
CD19+_BCells(neg._sel.)	1.41737	RPS25
CD19+_BCells(neg._sel.)	1.24091	IQCB1
CD19+_BCells(neg._sel.)	-0.32315	SOCS1
CD19+_BCells(neg._sel.)	-0.26997	CSF2RB
CD19+_BCells(neg._sel.)	3.05701	MALT1
CD19+_BCells(neg._sel.)	0.03701	IL12A
CD19+_BCells(neg._sel.)	-0.28271	MAPK1
CD33+_Myeloid	-0.17098	Wdr23(DCAF11)
CD33+_Myeloid	-0.53169	CDH2
CD33+_Myeloid	0.29175	SP110
CD33+_Myeloid	-0.30966	FCRL3
CD33+_Myeloid	-0.25954	C12orf51
CD33+_Myeloid	-0.29447	IL22RA2
CD33+_Myeloid	1.17319	IL2RA
CD33+_Myeloid	0.89555	YPEL2
CD33+_Myeloid	0.2553	BCL9L
CD33+_Myeloid	-0.11909	UBASH3B
CD33+_Myeloid	2.196	TYK2
CD33+_Myeloid	2.03485	SYK
CD33+_Myeloid	-0.34169	CHST12
CD33+_Myeloid	3.01178	EIF4EBP2
CD33+_Myeloid	0.37032	ARAP3
CD33+_Myeloid	-0.30977	IL7R
CD33+_Myeloid	-0.2782	CUX2
CD33+_Myeloid	0.2553	RBM45
CD33+_Myeloid	-0.11616	NDFIP1
CD33+_Myeloid	0.40365	IL12B
CD33+_Myeloid	0.28541	TRAFD1
CD33+_Myeloid	-0.54044	CARD11
CD33+_Myeloid	-0.16131	MAP3K14
CD33+_Myeloid	-0.35802	SP140
CD33+_Myeloid	-0.32482	TMEM87B
CD33+_Myeloid	1.24123	IL6
CD33+_Myeloid	-0.15091	C12orf65
CD33+_Myeloid	-0.65148	SLC30A7
CD33+_Myeloid	1.30466	STAT3
CD33+_Myeloid	1.12793	IL20RA
CD33+_Myeloid	-0.40489	CBLB
CD33+_Myeloid	0.16459	RPS25
CD33+_Myeloid	0.18983	IQCB1
CD33+_Myeloid	0.08264	SOCS1
CD33+_Myeloid	0.25548	CSF2RB
CD33+_Myeloid	0.33878	MALT1
CD33+_Myeloid	1.2805	IL12A
CD33+_Myeloid	0.04666	MAPK1
CD34+	0.02181	Wdr23(DCAF11)
CD34+	-0.08082	CDH2
CD34+	-0.22605	SP110
CD34+	-0.32675	FCRL3
CD34+	-0.01275	C12orf51
CD34+	-0.47134	IL22RA2
CD34+	0.87712	IL2RA
CD34+	-0.66855	YPEL2
CD34+	0.2553	BCL9L
CD34+	-0.86766	UBASH3B
CD34+	0.37597	TYK2
CD34+	0.49495	SYK
CD34+	-0.03563	CHST12
CD34+	0.64418	EIF4EBP2
CD34+	-0.16114	ARAP3
CD34+	-0.30967	IL7R
CD34+	-0.28212	CUX2
CD34+	0.2553	RBM45
CD34+	-0.43589	NDFIP1
CD34+	0.92602	IL12B
CD34+	-0.42519	TRAFD1
CD34+	-0.45946	CARD11
CD34+	-0.18412	MAP3K14
CD34+	-0.38431	SP140
CD34+	-0.32482	TMEM87B
CD34+	0.85932	IL6
CD34+	0.41579	C12orf65
CD34+	-1.01509	SLC30A7
CD34+	0.19421	STAT3
CD34+	1.02519	IL20RA
CD34+	-0.31897	CBLB
CD34+	1.06975	RPS25
CD34+	1.63939	IQCB1
CD34+	0.11307	SOCS1
CD34+	0.48792	CSF2RB
CD34+	-0.55965	MALT1
CD34+	1.2805	IL12A
CD34+	-0.23396	MAPK1
CD4+_Tcells	-0.22928	Wdr23(DCAF11)
CD4+_Tcells	-0.39342	CDH2
CD4+_Tcells	0.68433	SP110
CD4+_Tcells	-0.30966	FCRL3
CD4+_Tcells	-0.04801	C12orf51
CD4+_Tcells	-0.3483	IL22RA2
CD4+_Tcells	0.63039	IL2RA
CD4+_Tcells	0.51771	YPEL2
CD4+_Tcells	0.2553	BCL9L
CD4+_Tcells	-0.32325	UBASH3B
CD4+_Tcells	0.80824	TYK2
CD4+_Tcells	-0.54288	SYK
CD4+_Tcells	-0.08549	CHST12
CD4+_Tcells	-0.00089	EIF4EBP2
CD4+_Tcells	-0.238	ARAP3
CD4+_Tcells	3.71666	IL7R
CD4+_Tcells	-0.34141	CUX2
CD4+_Tcells	0.2553	RBM45
CD4+_Tcells	-0.24568	NDFIP1
CD4+_Tcells	-0.35616	IL12B
CD4+_Tcells	0.17754	TRAFD1
CD4+_Tcells	1.5651	CARD11
CD4+_Tcells	-0.08719	MAP3K14
CD4+_Tcells	0.82144	SP140
CD4+_Tcells	0.27485	TMEM87B
CD4+_Tcells	0.04092	IL6
CD4+_Tcells	1.87273	C12orf65
CD4+_Tcells	-1.01509	SLC30A7
CD4+_Tcells	0.44499	STAT3
CD4+_Tcells	0.25469	IL20RA
CD4+_Tcells	1.82301	CBLB
CD4+_Tcells	1.91638	RPS25
CD4+_Tcells	-0.32584	IQCB1
CD4+_Tcells	-0.2775	SOCS1
CD4+_Tcells	-0.36084	CSF2RB
CD4+_Tcells	0.90273	MALT1
CD4+_Tcells	-0.02221	IL12A
CD4+_Tcells	-0.25038	MAPK1
CD56+_NKCells	-0.00136	Wdr23(DCAF11)
CD56+_NKCells	-0.46476	CDH2
CD56+_NKCells	1.37699	SP110
CD56+_NKCells	3.27815	FCRL3
CD56+_NKCells	-0.31523	C12orf51
CD56+_NKCells	-0.34061	IL22RA2
CD56+_NKCells	0.46262	IL2RA
CD56+_NKCells	-0.24677	YPEL2
CD56+_NKCells	0.2553	BCL9L
CD56+_NKCells	-0.32325	UBASH3B
CD56+_NKCells	0.36979	TYK2
CD56+_NKCells	0.43384	SYK
CD56+_NKCells	4.46208	CHST12
CD56+_NKCells	1.75426	EIF4EBP2
CD56+_NKCells	-0.1377	ARAP3
CD56+_NKCells	-0.18685	IL7R
CD56+_NKCells	-0.31868	CUX2
CD56+_NKCells	0.2553	RBM45
CD56+_NKCells	-0.39508	NDFIP1
CD56+_NKCells	0.09498	IL12B
CD56+_NKCells	1.38433	TRAFD1
CD56+_NKCells	1.80804	CARD11
CD56+_NKCells	0.14088	MAP3K14
CD56+_NKCells	0.41671	SP140
CD56+_NKCells	-0.32482	TMEM87B
CD56+_NKCells	0.4774	IL6
CD56+_NKCells	-0.24282	C12orf65
CD56+_NKCells	-0.65148	SLC30A7
CD56+_NKCells	1.16851	STAT3
CD56+_NKCells	0.61426	IL20RA
CD56+_NKCells	3.20526	CBLB
CD56+_NKCells	0.50966	RPS25
CD56+_NKCells	-0.16793	IQCB1
CD56+_NKCells	0.00148	SOCS1
CD56+_NKCells	-0.33459	CSF2RB
CD56+_NKCells	1.10898	MALT1
CD56+_NKCells	0.56993	IL12A
CD56+_NKCells	0.49689	MAPK1
CD71+_EarlyErythroid	4.60076	Wdr23(DCAF11)
CD71+_EarlyErythroid	-0.39943	CDH2
CD71+_EarlyErythroid	-0.67269	SP110
CD71+_EarlyErythroid	-0.25841	FCRL3
CD71+_EarlyErythroid	3.83565	C12orf51
CD71+_EarlyErythroid	0.05159	IL22RA2
CD71+_EarlyErythroid	-0.77103	IL2RA
CD71+_EarlyErythroid	-0.04467	YPEL2
CD71+_EarlyErythroid	0.2553	BCL9L
CD71+_EarlyErythroid	1.03779	UBASH3B
CD71+_EarlyErythroid	-0.78175	TYK2
CD71+_EarlyErythroid	-0.54564	SYK
CD71+_EarlyErythroid	-0.35932	CHST12
CD71+_EarlyErythroid	0.59399	EIF4EBP2
CD71+_EarlyErythroid	-0.32787	ARAP3
CD71+_EarlyErythroid	-0.31129	IL7R
CD71+_EarlyErythroid	-0.28865	CUX2
CD71+_EarlyErythroid	0.2553	RBM45
CD71+_EarlyErythroid	0.13083	NDFIP1
CD71+_EarlyErythroid	-0.5936	IL12B
CD71+_EarlyErythroid	-0.68812	TRAFD1
CD71+_EarlyErythroid	-0.49995	CARD11
CD71+_EarlyErythroid	-0.34947	MAP3K14
CD71+_EarlyErythroid	-0.41906	SP140
CD71+_EarlyErythroid	0.87452	TMEM87B
CD71+_EarlyErythroid	-0.66836	IL6
CD71+_EarlyErythroid	-0.38501	C12orf65
CD71+_EarlyErythroid	0.80298	SLC30A7
CD71+_EarlyErythroid	-1.33545	STAT3
CD71+_EarlyErythroid	-0.56717	IL20RA
CD71+_EarlyErythroid	-0.45651	CBLB
CD71+_EarlyErythroid	-0.55658	RPS25
CD71+_EarlyErythroid	-0.51706	IQCB1
CD71+_EarlyErythroid	-0.35866	SOCS1
CD71+_EarlyErythroid	-0.36218	CSF2RB
CD71+_EarlyErythroid	-0.61358	MALT1
CD71+_EarlyErythroid	-0.55513	IL12A
CD71+_EarlyErythroid	0.0397	MAPK1
CD8+_Tcells	-0.2308	Wdr23(DCAF11)
CD8+_Tcells	-0.60904	CDH2
CD8+_Tcells	0.46986	SP110
CD8+_Tcells	-0.30966	FCRL3
CD8+_Tcells	0.27951	C12orf51
CD8+_Tcells	-0.25602	IL22RA2
CD8+_Tcells	-0.15914	IL2RA
CD8+_Tcells	0.21895	YPEL2
CD8+_Tcells	0.2553	BCL9L
CD8+_Tcells	-0.79961	UBASH3B
CD8+_Tcells	1.18885	TYK2
CD8+_Tcells	-0.54612	SYK
CD8+_Tcells	0.53997	CHST12
CD8+_Tcells	-0.01421	EIF4EBP2
CD8+_Tcells	-0.30834	ARAP3
CD8+_Tcells	2.69256	IL7R
CD8+_Tcells	-0.30484	CUX2
CD8+_Tcells	0.2553	RBM45
CD8+_Tcells	0.27285	NDFIP1
CD8+_Tcells	-0.97351	IL12B
CD8+_Tcells	-0.27012	TRAFD1
CD8+_Tcells	1.36939	CARD11
CD8+_Tcells	-0.25824	MAP3K14
CD8+_Tcells	0.51907	SP140
CD8+_Tcells	-0.32482	TMEM87B
CD8+_Tcells	-0.6138	IL6
CD8+_Tcells	1.76969	C12orf65
CD8+_Tcells	-1.01509	SLC30A7
CD8+_Tcells	0.11244	STAT3
CD8+_Tcells	-0.46444	IL20RA
CD8+_Tcells	2.47983	CBLB
CD8+_Tcells	1.69009	RPS25
CD8+_Tcells	-0.19261	IQCB1
CD8+_Tcells	-0.488	SOCS1
CD8+_Tcells	-0.36185	CSF2RB
CD8+_Tcells	0.67095	MALT1
CD8+_Tcells	-0.73277	IL12A
CD8+_Tcells	-0.15811	MAPK1
Colon	-0.39814	Wdr23(DCAF11)
Colon	-0.35455	CDH2
Colon	-0.61421	SP110
Colon	-0.29258	FCRL3
Colon	-0.44603	C12orf51
Colon	-0.01762	IL22RA2
Colon	-0.27757	IL2RA
Colon	-0.2292	YPEL2
Colon	0.2553	BCL9L
Colon	0.01701	UBASH3B
Colon	-0.83076	TYK2
Colon	-0.54199	SYK
Colon	-0.34169	CHST12
Colon	-0.39558	EIF4EBP2
Colon	-0.27577	ARAP3
Colon	-0.31091	IL7R
Colon	-0.28995	CUX2
Colon	0.2553	RBM45
Colon	0.99861	NDFIP1
Colon	-0.45114	IL12B
Colon	-0.74205	TRAFD1
Colon	-0.5202	CARD11
Colon	-0.30955	MAP3K14
Colon	-0.40967	SP140
Colon	0.87452	TMEM87B
Colon	-0.23188	IL6
Colon	-0.33638	C12orf65
Colon	0.07575	SLC30A7
Colon	-0.72319	STAT3
Colon	-0.25897	IL20RA
Colon	-0.4086	CBLB
Colon	0.6954	RPS25
Colon	-0.46401	IQCB1
Colon	-0.33076	SOCS1
Colon	-0.3614	CSF2RB
Colon	-0.60067	MALT1
Colon	-0.25906	IL12A
Colon	-0.31877	MAPK1
Fetalbrain	-0.38482	Wdr23(DCAF11)
Fetalbrain	4.00904	CDH2
Fetalbrain	-0.67327	SP110
Fetalbrain	-0.27549	FCRL3
Fetalbrain	2.25173	C12orf51
Fetalbrain	0.01314	IL22RA2
Fetalbrain	-0.5243	IL2RA
Fetalbrain	-0.14133	YPEL2
Fetalbrain	0.2553	BCL9L
Fetalbrain	0.49337	UBASH3B
Fetalbrain	-0.78616	TYK2
Fetalbrain	-0.54371	SYK
Fetalbrain	-0.36361	CHST12
Fetalbrain	-0.87137	EIF4EBP2
Fetalbrain	-0.26535	ARAP3
Fetalbrain	-0.31096	IL7R
Fetalbrain	1.41419	CUX2
Fetalbrain	0.2553	RBM45
Fetalbrain	2.10464	NDFIP1
Fetalbrain	-0.26118	IL12B
Fetalbrain	-0.57351	TRAFD1
Fetalbrain	-0.51345	CARD11
Fetalbrain	-0.32096	MAP3K14
Fetalbrain	-0.41624	SP140
Fetalbrain	-0.32482	TMEM87B
Fetalbrain	1.29579	IL6
Fetalbrain	-0.34462	C12orf65
Fetalbrain	0.43937	SLC30A7
Fetalbrain	-1.23411	STAT3
Fetalbrain	-0.51581	IL20RA
Fetalbrain	-0.44816	CBLB
Fetalbrain	-0.4736	RPS25
Fetalbrain	-0.46401	IQCB1
Fetalbrain	-0.33583	SOCS1
Fetalbrain	-0.36151	CSF2RB
Fetalbrain	-0.61071	MALT1
Fetalbrain	-0.4367	IL12A
Fetalbrain	-0.30254	MAPK1
Heart	-0.23231	Wdr23(DCAF11)
Heart	1.94507	CDH2
Heart	-0.65122	SP110
Heart	-0.44634	FCRL3
Heart	-0.42508	C12orf51
Heart	-1.22498	IL22RA2
Heart	2.2884	IL2RA
Heart	-1.37152	YPEL2
Heart	-4.51024	BCL9L
Heart	-3.58972	UBASH3B
Heart	-0.52301	TYK2
Heart	-0.52236	SYK
Heart	-0.30816	CHST12
Heart	-0.7537	EIF4EBP2
Heart	-0.09992	ARAP3
Heart	-0.30972	IL7R
Heart	-0.256	CUX2
Heart	-4.51024	RBM45
Heart	-0.7502	NDFIP1
Heart	2.94426	IL12B
Heart	-0.13933	TRAFD1
Heart	-0.58768	CARD11
Heart	-0.19552	MAP3K14
Heart	-0.34205	SP140
Heart	-3.92287	TMEM87B
Heart	1.40491	IL6
Heart	-1.34326	C12orf65
Heart	-3.19678	SLC30A7
Heart	-0.52638	STAT3
Heart	1.89843	IL20RA
Heart	-0.39098	CBLB
Heart	-1.57213	RPS25
Heart	0.04426	IQCB1
Heart	1.3203	SOCS1
Heart	-0.35915	CSF2RB
Heart	-0.50601	MALT1
Heart	2.16871	IL12A
Heart	-0.32765	MAPK1
Kidney	-0.26639	Wdr23(DCAF11)
Kidney	-0.09485	CDH2
Kidney	-0.67467	SP110
Kidney	-0.24132	FCRL3
Kidney	-0.51858	C12orf51
Kidney	0.09004	IL22RA2
Kidney	0.48235	IL2RA
Kidney	0.34197	YPEL2
Kidney	0.2553	BCL9L
Kidney	1.03779	UBASH3B
Kidney	-0.79985	TYK2
Kidney	-0.54922	SYK
Kidney	-0.37307	CHST12
Kidney	-0.74094	EIF4EBP2
Kidney	-0.37477	ARAP3
Kidney	-0.31167	IL7R
Kidney	-0.29439	CUX2
Kidney	0.2553	RBM45
Kidney	-0.2255	NDFIP1
Kidney	-0.45114	IL12B
Kidney	-0.97802	TRAFD1
Kidney	-0.5067	CARD11
Kidney	-0.38368	MAP3K14
Kidney	-0.42657	SP140
Kidney	0.87452	TMEM87B
Kidney	-1.26851	IL6
Kidney	-0.75677	C12orf65
Kidney	1.1666	SLC30A7
Kidney	-0.15399	STAT3
Kidney	-0.82401	IL20RA
Kidney	-0.47196	CBLB
Kidney	-1.38679	RPS25
Kidney	-0.69224	IQCB1
Kidney	-0.3612	SOCS1
Kidney	-0.36331	CSF2RB
Kidney	-0.6242	MALT1
Kidney	-1.14727	IL12A
Kidney	-0.34665	MAPK1
Liver	0.23944	Wdr23(DCAF11)
Liver	0.40491	CDH2
Liver	-0.64209	SP110
Liver	-0.30966	FCRL3
Liver	-0.46289	C12orf51
Liver	-0.29447	IL22RA2
Liver	1.94298	IL2RA
Liver	1.96758	YPEL2
Liver	-1.10628	BCL9L
Liver	-0.32325	UBASH3B
Liver	-0.53493	TYK2
Liver	-0.5205	SYK
Liver	-0.34857	CHST12
Liver	-0.65162	EIF4EBP2
Liver	-0.09471	ARAP3
Liver	-0.30962	IL7R
Liver	-0.04315	CUX2
Liver	-1.10628	RBM45
Liver	-0.36134	NDFIP1
Liver	2.2082	IL12B
Liver	-0.03146	TRAFD1
Liver	-0.5337	CARD11
Liver	-0.17842	MAP3K14
Liver	-0.3599	SP140
Liver	-0.32482	TMEM87B
Liver	2.05963	IL6
Liver	-1.15243	C12orf65
Liver	0.07575	SLC30A7
Liver	-0.32411	STAT3
Liver	2.20663	IL20RA
Liver	-0.38017	CBLB
Liver	-1.50048	RPS25
Liver	-0.01372	IQCB1
Liver	0.68371	SOCS1
Liver	-0.35893	CSF2RB
Liver	-0.52035	MALT1
Liver	2.16871	IL12A
Liver	-0.33454	MAPK1
Lung	-0.36483	Wdr23(DCAF11)
Lung	-0.10086	CDH2
Lung	-0.61299	SP110
Lung	-0.27549	FCRL3
Lung	-0.29837	C12orf51
Lung	-0.75588	IL22RA2
Lung	0.06785	IL2RA
Lung	0.21895	YPEL2
Lung	0.2553	BCL9L
Lung	0.35727	UBASH3B
Lung	-0.57731	TYK2
Lung	-0.5103	SYK
Lung	0.14535	CHST12
Lung	-0.47299	EIF4EBP2
Lung	0.27002	ARAP3
Lung	-0.26795	IL7R
Lung	-0.30615	CUX2
Lung	0.2553	RBM45
Lung	-0.18107	NDFIP1
Lung	-0.14246	IL12B
Lung	-0.39552	TRAFD1
Lung	-0.5202	CARD11
Lung	-0.26964	MAP3K14
Lung	-0.39934	SP140
Lung	-0.32482	TMEM87B
Lung	0.80476	IL6
Lung	-0.70113	C12orf65
Lung	0.43937	SLC30A7
Lung	1.98695	STAT3
Lung	0.25469	IL20RA
Lung	-0.42251	CBLB
Lung	-0.90395	RPS25
Lung	-0.39986	IQCB1
Lung	0.68625	SOCS1
Lung	-0.36039	CSF2RB
Lung	-0.59063	MALT1
Lung	0.39229	IL12A
Lung	-0.34034	MAPK1
Ovary	-0.43676	Wdr23(DCAF11)
Ovary	-0.41466	CDH2
Ovary	-0.67956	SP110
Ovary	-0.25841	FCRL3
Ovary	-0.55179	C12orf51
Ovary	0.16694	IL22RA2
Ovary	-1.98493	IL2RA
Ovary	0.83404	YPEL2
Ovary	0.2553	BCL9L
Ovary	0.69753	UBASH3B
Ovary	-0.91554	TYK2
Ovary	-0.55735	SYK
Ovary	-0.3937	CHST12
Ovary	-0.88413	EIF4EBP2
Ovary	-0.46725	ARAP3
Ovary	-0.31239	IL7R
Ovary	-0.31137	CUX2
Ovary	0.2553	RBM45
Ovary	-0.73906	NDFIP1
Ovary	-0.92602	IL12B
Ovary	-1.02926	TRAFD1
Ovary	-0.5067	CARD11
Ovary	-0.37797	MAP3K14
Ovary	-0.44723	SP140
Ovary	0.87452	TMEM87B
Ovary	-2.08691	IL6
Ovary	-0.66321	C12orf65
Ovary	1.1666	SLC30A7
Ovary	-0.24611	STAT3
Ovary	-2.10817	IL20RA
Ovary	-0.44507	CBLB
Ovary	0.22472	RPS25
Ovary	-0.78847	IQCB1
Ovary	-0.84307	SOCS1
Ovary	-0.3642	CSF2RB
Ovary	-0.64055	MALT1
Ovary	-1.32491	IL12A
Ovary	-0.36191	MAPK1
Pancreas	-0.37164	Wdr23(DCAF11)
Pancreas	-0.36457	CDH2
Pancreas	-0.6777	SP110
Pancreas	-0.27549	FCRL3
Pancreas	-0.50836	C12orf51
Pancreas	-0.00224	IL22RA2
Pancreas	-1.39278	IL2RA
Pancreas	-0.79157	YPEL2
Pancreas	0.2553	BCL9L
Pancreas	0.90168	UBASH3B
Pancreas	-0.8025	TYK2
Pancreas	-0.53014	SYK
Pancreas	-0.37178	CHST12
Pancreas	-0.86854	EIF4EBP2
Pancreas	-0.3917	ARAP3
Pancreas	-0.31082	IL7R
Pancreas	-0.30354	CUX2
Pancreas	0.2553	RBM45
Pancreas	-0.72189	NDFIP1
Pancreas	-0.92602	IL12B
Pancreas	-0.83644	TRAFD1
Pancreas	-0.51345	CARD11
Pancreas	-0.40078	MAP3K14
Pancreas	-0.43126	SP140
Pancreas	0.87452	TMEM87B
Pancreas	-1.26851	IL6
Pancreas	-0.85692	C12orf65
Pancreas	1.1666	SLC30A7
Pancreas	-0.65442	STAT3
Pancreas	-1.28631	IL20RA
Pancreas	-0.47907	CBLB
Pancreas	-0.4027	RPS25
Pancreas	-0.6836	IQCB1
Pancreas	-0.66047	SOCS1
Pancreas	-0.36319	CSF2RB
Pancreas	-0.6262	MALT1
Pancreas	-1.32491	IL12A
Pancreas	-0.36803	MAPK1
Skin	-0.4045	Wdr23(DCAF11)
Skin	-0.33531	CDH2
Skin	-0.68061	SP110
Skin	-0.29258	FCRL3
Skin	-0.53136	C12orf51
Skin	4.44267	IL22RA2
Skin	-1.09671	IL2RA
Skin	0.08714	YPEL2
Skin	0.2553	BCL9L
Skin	0.15312	UBASH3B
Skin	-0.91642	TYK2
Skin	-0.54908	SYK
Skin	-0.37436	CHST12
Skin	-0.83933	EIF4EBP2
Skin	-0.40473	ARAP3
Skin	-0.31191	IL7R
Skin	-0.29701	CUX2
Skin	0.2553	RBM45
Skin	-0.84478	NDFIP1
Skin	0.66483	IL12B
Skin	0.03326	TRAFD1
Skin	-0.5202	CARD11
Skin	-0.41789	MAP3K14
Skin	-0.42469	SP140
Skin	-0.32482	TMEM87B
Skin	-1.21395	IL6
Skin	1.73136	C12orf65
Skin	0.07575	SLC30A7
Skin	-1.14744	STAT3
Skin	-0.82401	IL20RA
Skin	-0.47598	CBLB
Skin	-0.85966	RPS25
Skin	-0.44304	IQCB1
Skin	-0.54634	SOCS1
Skin	-0.36353	CSF2RB
Skin	-0.59981	MALT1
Skin	-1.08806	IL12A
Skin	-0.35611	MAPK1
WholeBlood	-0.34438	Wdr23(DCAF11)
WholeBlood	-0.31126	CDH2
WholeBlood	1.20714	SP110
WholeBlood	-0.27549	FCRL3
WholeBlood	-0.44399	C12orf51
WholeBlood	0.02852	IL22RA2
WholeBlood	0.08759	IL2RA
WholeBlood	-0.14133	YPEL2
WholeBlood	0.2553	BCL9L
WholeBlood	0.49337	UBASH3B
WholeBlood	0.53051	TYK2
WholeBlood	-0.07856	SYK
WholeBlood	-0.32149	CHST12
WholeBlood	0.35723	EIF4EBP2
WholeBlood	4.59464	ARAP3
WholeBlood	-0.06513	IL7R
WholeBlood	-0.26645	CUX2
WholeBlood	0.2553	RBM45
WholeBlood	0.23595	NDFIP1
WholeBlood	-0.16621	IL12B
WholeBlood	1.83333	TRAFD1
WholeBlood	-0.51345	CARD11
WholeBlood	-0.25254	MAP3K14
WholeBlood	0.08898	SP140
WholeBlood	0.27485	TMEM87B
WholeBlood	0.25916	IL6
WholeBlood	-0.62901	C12orf65
WholeBlood	0.43937	SLC30A7
WholeBlood	1.97283	STAT3
WholeBlood	0.20333	IL20RA
WholeBlood	-0.22408	CBLB
WholeBlood	0.4337	RPS25
WholeBlood	-0.36532	IQCB1
WholeBlood	-0.26482	SOCS1
WholeBlood	4.27266	CSF2RB
WholeBlood	-0.45151	MALT1
WholeBlood	0.21465	IL12A
WholeBlood	-0.03448	MAPK1
Wholebrain	-0.35801	Wdr23(DCAF11)
Wholebrain	0.15042	CDH2
Wholebrain	-0.67787	SP110
Wholebrain	-0.30966	FCRL3
Wholebrain	0.10476	C12orf51
Wholebrain	-0.21757	IL22RA2
Wholebrain	-1.39278	IL2RA
Wholebrain	-0.73006	YPEL2
Wholebrain	0.2553	BCL9L
Wholebrain	-0.18714	UBASH3B
Wholebrain	-0.79985	TYK2
Wholebrain	-0.55287	SYK
Wholebrain	-0.36963	CHST12
Wholebrain	-0.92808	EIF4EBP2
Wholebrain	-0.32266	ARAP3
Wholebrain	-0.31163	IL7R
Wholebrain	0.06785	CUX2
Wholebrain	0.2553	RBM45
Wholebrain	3.5024	NDFIP1
Wholebrain	-1.54336	IL12B
Wholebrain	-0.9106	TRAFD1
Wholebrain	-0.52695	CARD11
Wholebrain	-0.37797	MAP3K14
Wholebrain	-0.43784	SP140
Wholebrain	-0.32482	TMEM87B
Wholebrain	-1.05028	IL6
Wholebrain	-0.68464	C12orf65
Wholebrain	-0.28786	SLC30A7
Wholebrain	-1.13178	STAT3
Wholebrain	-1.49177	IL20RA
Wholebrain	-0.48062	CBLB
Wholebrain	-1.04891	RPS25
Wholebrain	-0.7786	IQCB1
Wholebrain	-0.79996	SOCS1
Wholebrain	-0.36286	CSF2RB
Wholebrain	-0.64055	MALT1
Wholebrain	-1.38413	IL12A
Wholebrain	-0.07182	MAPK1
